# Supplementary material for: Impact of introducing electric vehicles on ground-level O 3 and PM 2.5 in the Greater Tokyo Area: Yearly trends and the importance of changes in the Urban Heat Island effect
Source: Copernicus journal article supplement (doi:10.5194/egusphere-2024-1961), 2024-07-25
Supplement: Supplementary file 1 [file egusphere-2024-1961-supplement.pdf]

## Supplementary Information

# Impact of introducing electric vehicles to the ground-level O<sub>3</sub> and PM<sub>2.5</sub> in the Greater Tokyo Area: Yearly trend and the importance of the change of Urban Heat Island effect

Hiroo Hata<sup>a,\*</sup>, Norifumi Mizushima<sup>b</sup>, Tomohiko Ihara<sup>c</sup>

*a* Research Institute of Science for Safety and Sustainability, National Institute of Advanced Industrial Science and Technology (AIST), 16-1 Onogawa, Tsukuba, Ibaraki 305-8569, Japan

*b* Research Institute for Energy Conservation, National Institute of Advanced Industrial Science and Technology (AIST), 1-2-1 Namiki, Tsukuba, Ibaraki 305-8564, Japan

*c*. Graduate School of Frontier Sciences, University of Tokyo, Kashiwano-ha, Kashiwa, Chiba 277-8563, Japan

\*Corresponding author. E-mail: hata-hiroo@aist.go.jp; Tel: +81-29-861-8413

3 Tables and 8 Figures

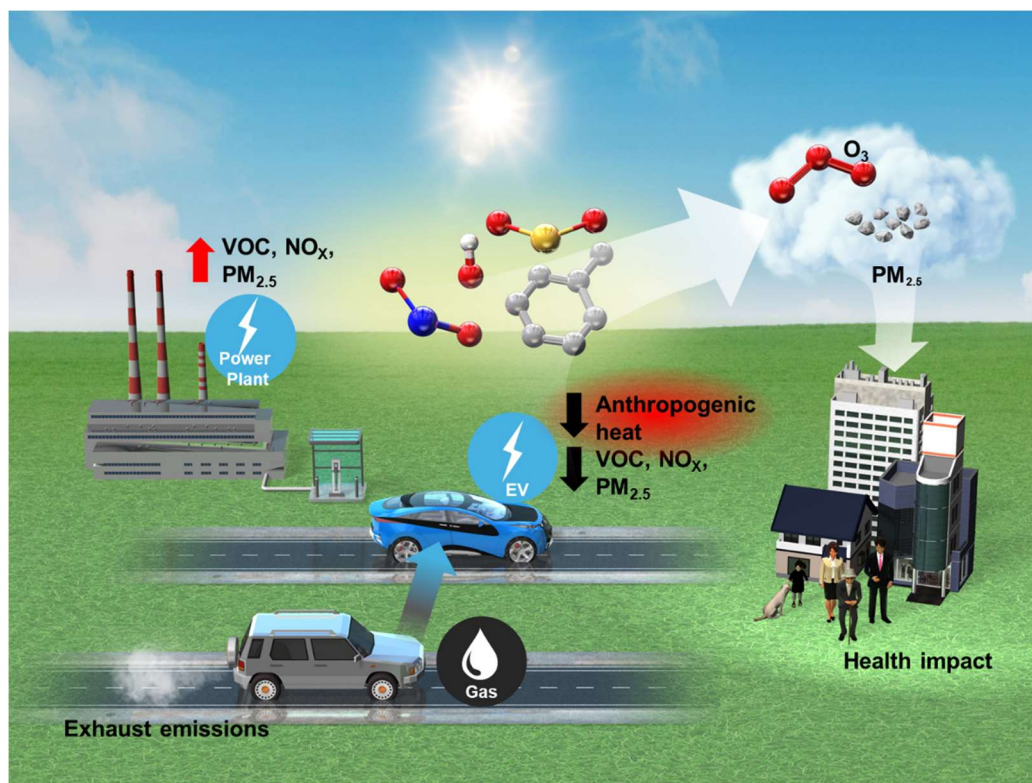

1 **Text S1** *Additional information on numerical simulations*

2 Table S1: Latitude and longitude of the four sites analyzed for model validation in this study.

| City  | Longitude | Latitude |
|-------|-----------|----------|
| Tokyo | 139.75    | 35.69    |
| Gunma | 139.07    | 36.38    |

3

4

Table S2: Calculation settings for the WRF.

| <b>Model</b>                      | <b>WRF-ARW v4.3.3</b>                                                  |
|-----------------------------------|------------------------------------------------------------------------|
| Reanalysis                        | NCEP FNL (1 deg., 6 hr)                                                |
| SST                               | NOAA SST (0.082 deg., 6 hr)                                            |
| domains                           | 220×170, 45 km (D1), 154×160 (D2), 64×70 (D3)                          |
| Minimum vertical pressure (p_top) | 100 hPa                                                                |
| Grid nudging                      | k_zfac_uv = 10<br>guv, gt, gq = 0.0001 (D1), 0.00005 (D2), 0.0000 (D3) |
| Microphysics                      | WRF Single-Moment 5-class scheme                                       |
| Longwave radiation                | RRTMG scheme                                                           |
| Shortwave radiation               | RRTMG scheme                                                           |
| Planetary boundary layer          | Mellor-Yamada Nakanishi and Niino Level 3 PBL scheme                   |
| Cloud Physics                     | Kain-Fritsch scheme                                                    |
| Urban physics                     | Urban-canopy model (UCM)                                               |

5

6

Table S3: Calculation settings for the CMAQ.

| <b>Model</b>                  | <b>CMAQv5.3.3</b>             |
|-------------------------------|-------------------------------|
| Boundary concentration (D1)   | MOZART-4/GEOS5                |
| Boundary concentration (D2)   | Nested from D1                |
| Boundary concentration (D3)   | Nested from D2                |
| Initial concentration (D1)    | CMAQ default (profile)        |
| Initial concentration (D2)    | Nested from D1                |
| Initial concentration (D3)    | Nested from D2                |
| Gas/Aerosol/Aqueous chemistry | saprc07tc/aero6/cloud_acm_ae6 |
| Photolysis                    | phot_inline                   |
| Horizontal advection          | Yamo                          |
| Vertical advection            | wrf                           |
| Horizontal diffusion          | hdiff/multiscale              |
| Vertical diffusion            | vdiff/acm                     |
| Dry deposition                | m3dry                         |

7

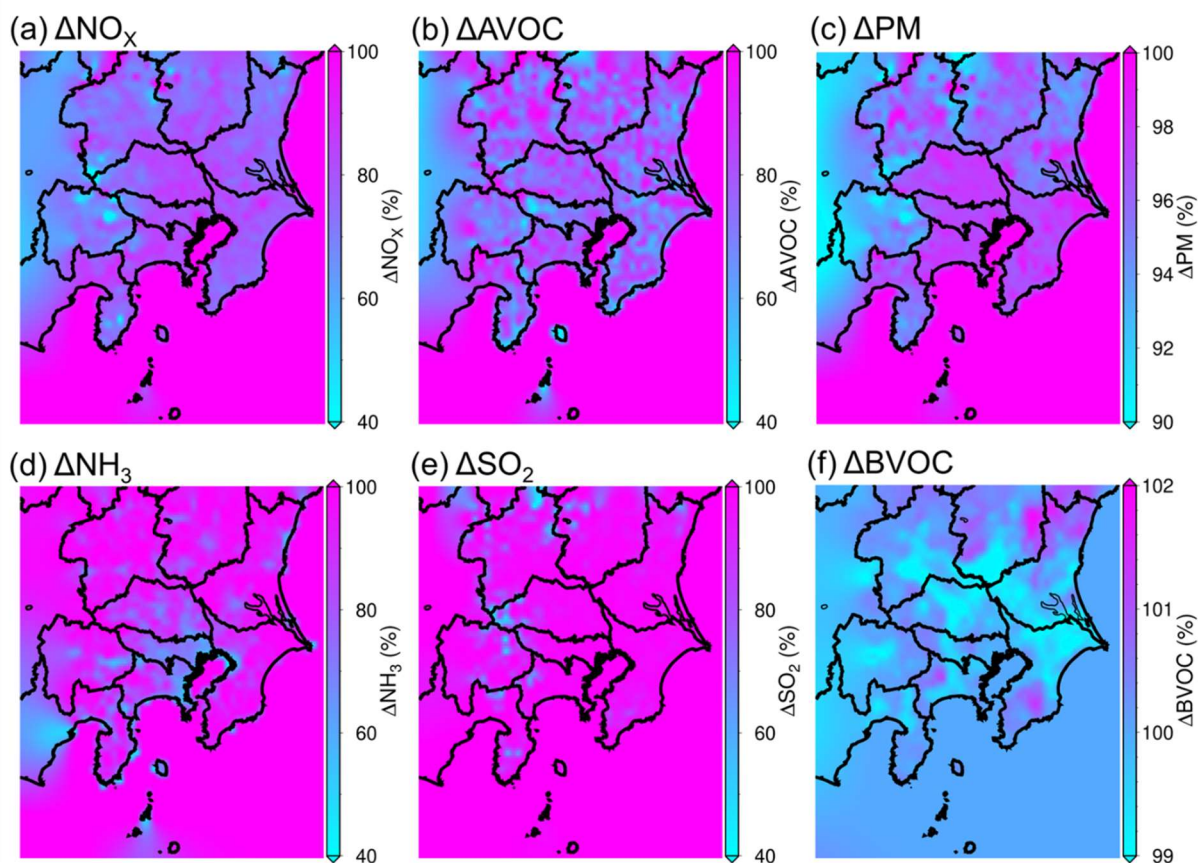

8

9 Fig. S1: Changes in the annual emissions from ALL and BASE scenarios (ALL/BASE) in terms of: (a)  $\text{NO}_x$ , (b) anthropogenic VOCs (AVOC), (c) particulate matter (PM), (d)  $\text{NH}_3$ , (e)  $\text{SO}_2$ ,  
 10 and (f) biogenic VOCs (BVOC). All factors affected by the introduction of EVs: reduction of tailpipe exhaust and evaporative emissions, increase in emissions from power plants owing to  
 11 battery charging, and the change in BVOC emissions caused by the change in the UHI effect, are included.

15

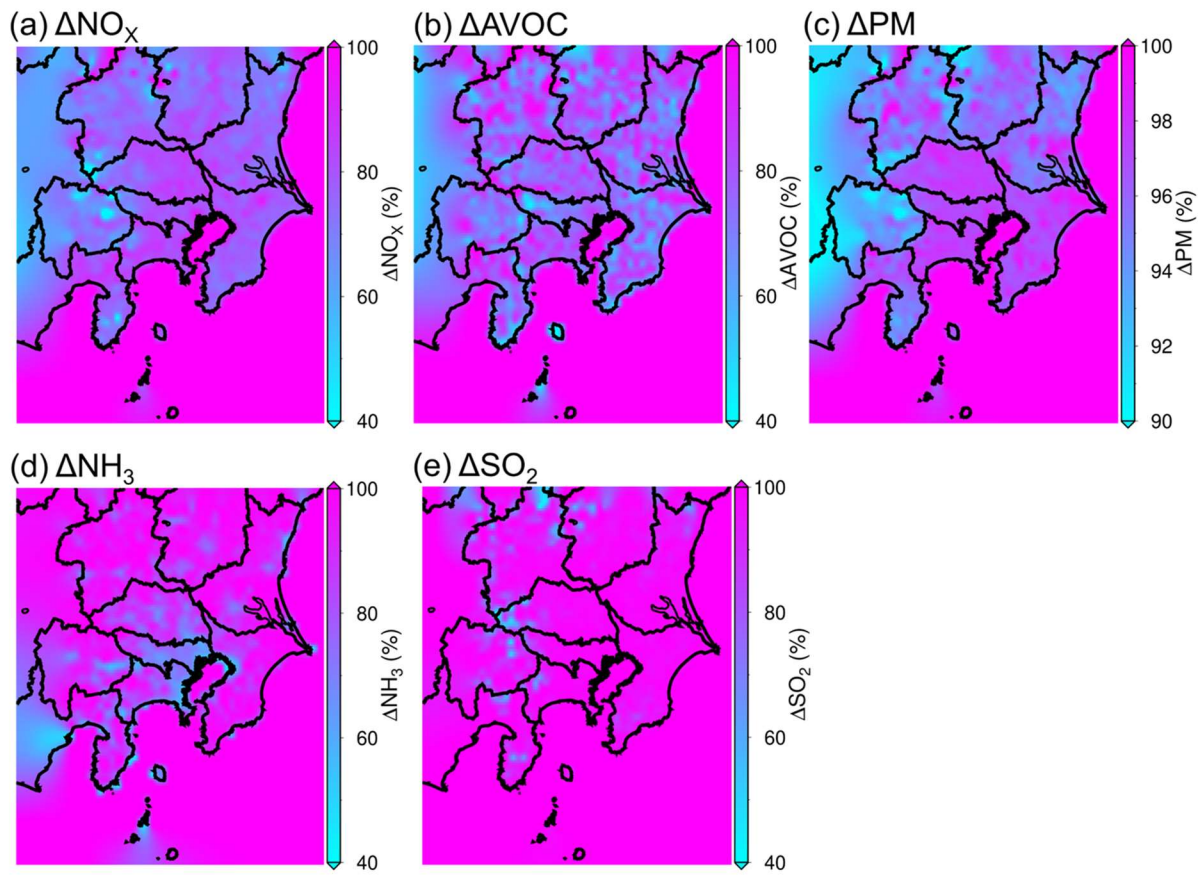

16

17 Fig. S2: Changes in the annual emissions produced by the SEV and BASE scenarios (SEV/BASE)  
 18 for: (a) NO<sub>x</sub>, (b) anthropogenic VOC (AVOC), (c) particulate matter (PM), (d) NH<sub>3</sub>, and (e)  
 19 SO<sub>2</sub>.

20

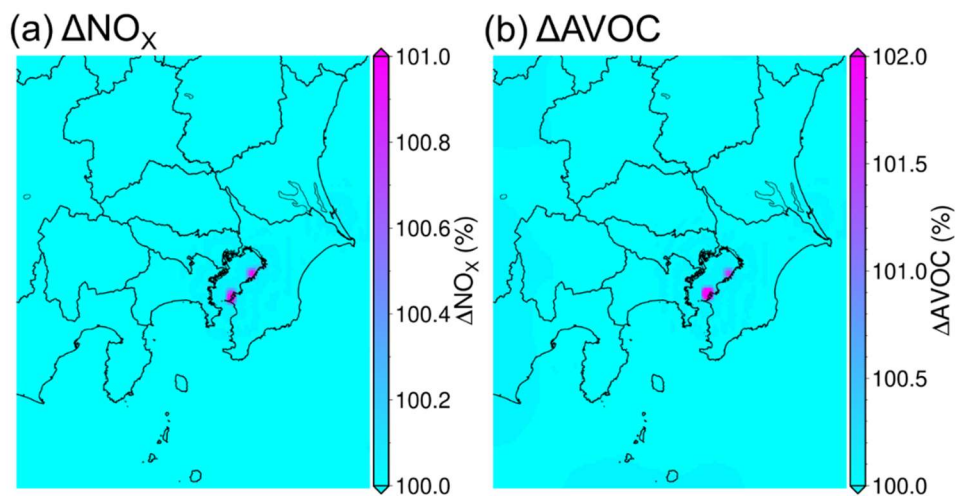

21

22 Fig. S3: Changes in annual emissions produced by the SPP and BASE scenarios (SPP/BASES)  
 23 for (a) NO<sub>x</sub> and (b) anthropogenic VOCs (AVOC). Significant changes were observed in the  
 24 NO<sub>x</sub> and AVOC emissions.



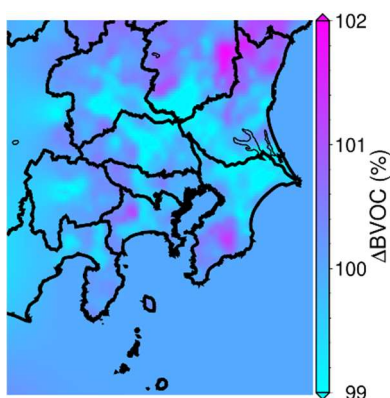

25  
 26 Fig. S4: Changes in annual BVOC emissions produced by the  $S_{BVOC}$  and BASE scenarios  
 27 ( $S_{BVOC}/BASE$ ). BVOC are defined as the sum of isoprene, monoterpenes, and sesquiterpenes.  
 28 The change in BVOC emissions from the BASE scenario was caused by a change in the UHI  
 29 effect owing to the introduction of EVs.

30

31 **Text S3** *Additional information of results section*

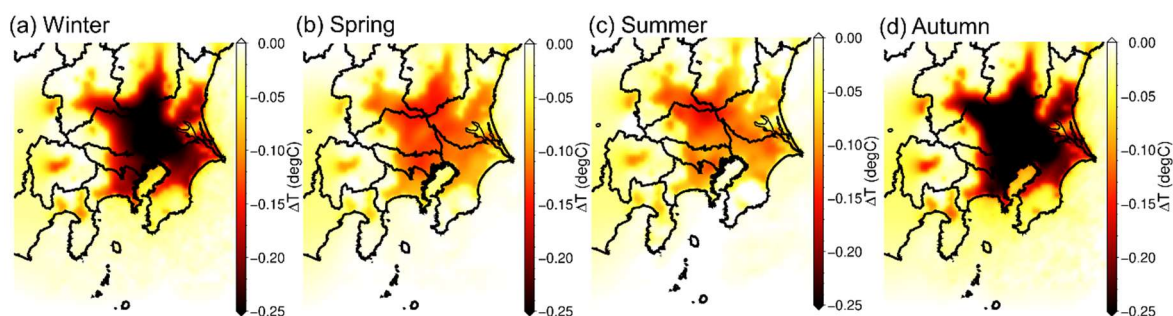

32  
 33 Fig. S5: Changes in ground temperature resulting from decrease in the UHI effect owing to  
 34 the introduction of EVs in the GTA.

35

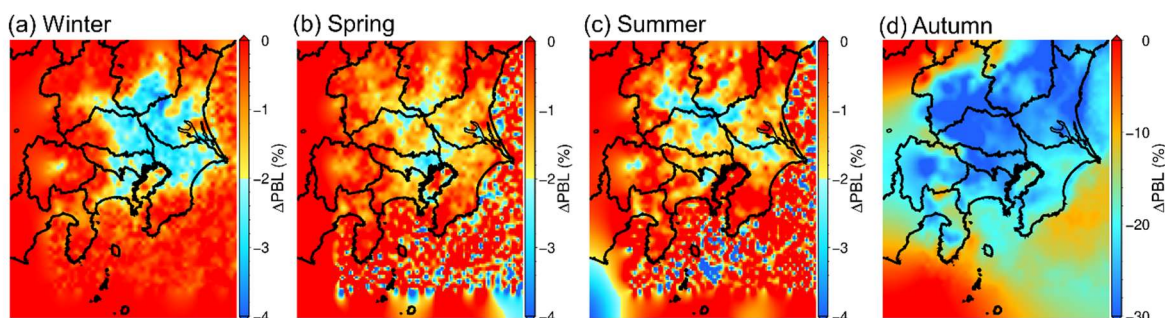

36  
 37 Fig. S6: Changes in planetary boundary layer (PBL: %) from the ground surface to the free  
 38 troposphere resulting from decrease in the UHI effect owing to the introduction of EVs in the  
 39 GTA.

40

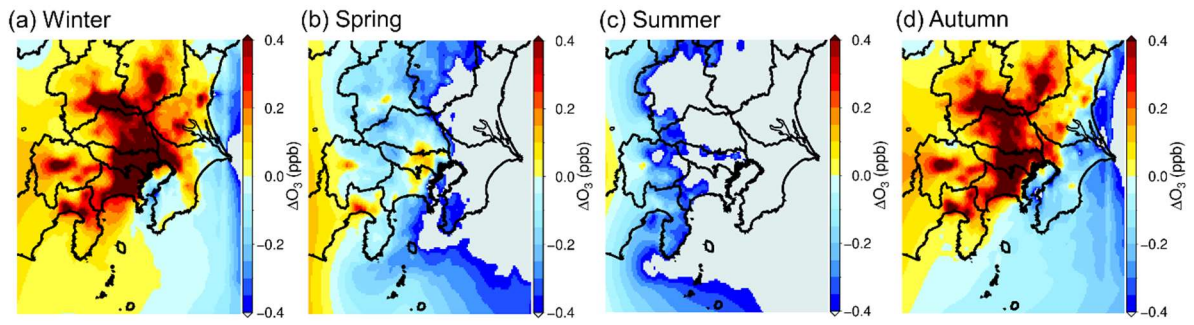

41

42 Fig. S7: Changes in O<sub>3</sub> concentration after the introduction of EVs in the GTA in four seasons.

43

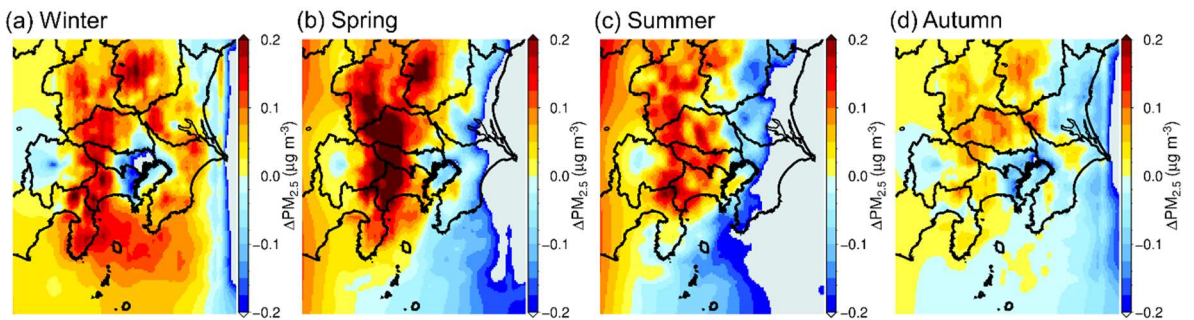

44

45 Fig. S8: Changes in PM<sub>2.5</sub> concentration after the introduction of EVs to the GTA in four seasons.
